# Supplementary material for: Acceptability of a Sublingual Drug Formulation for Respiratory Tract Infections in Children Aged 3 to 5 Years
Source: PubMed Central journal article supplement (PMC7926363; doi:10.3390/pharmaceutics13020294), 2021-02-23
Supplement: pharmaceutics-13-00294-s001.pdf [file pharmaceutics-13-00294-s001.pdf]

# Supplementary Materials: Acceptability of a Sublingual Drug Formulation for Respiratory Tract Infections in Children Aged 3 to 5 Years

Andrzej Emeryk, Thibault Vallet, Ewelina Wawryk-Gawda, Arkadiusz Jędrzejewski, Frederic Durmont and Fabrice Ruiz

**Table S1.** Patient and medicine characteristics of the 424 evaluations in children from 3 to 5 years of age within the dataset that gave rise to the acceptability reference framework.

| Patients and medicines characteristics                | n(%)     |
|-------------------------------------------------------|----------|
| <b>Sex of patients</b>                                |          |
| Girl                                                  | 176 (42) |
| Boy                                                   | 246 (58) |
| missing data                                          | 2        |
| <b>Age of patient (years)</b>                         |          |
| 3                                                     | 186 (43) |
| 4                                                     | 121 (29) |
| 5                                                     | 117 (28) |
| <b>Treatment exposure</b>                             |          |
| Previous exposure                                     | 213 (50) |
| First exposure                                        | 211 (50) |
| <b>Type of care</b>                                   |          |
| Home                                                  | 87 (21)  |
| Hospital                                              | 337 (79) |
| <b>Country</b>                                        |          |
| Morocco                                               | 168 (40) |
| France                                                | 100 (24) |
| India                                                 | 78 (18)  |
| Japan                                                 | 34 (8)   |
| Norway                                                | 27 (6)   |
| Germany                                               | 11 (3)   |
| England                                               | 6 (1)    |
| <b>Pharmaceutical products</b>                        |          |
| Doliprane 2.4perc. Oral suspension sugar free         | 29 (7)   |
| Cefaclor 10perc. Fine granules                        | 21 (5)   |
| Depakine 57.64mg-1ml. Syrup                           | 18 (4)   |
| Oroken children 100mg-5ml. Powder for oral suspension | 17 (4)   |
| Orapred 20mg. Effervescent tablet                     | 13 (3)   |
| Celestene 0.05perc. Drops for oral solution           | 13 (3)   |
| Aerius 0.5mg-1ml. Oral solution                       | 13 (3)   |
| Fucidine 250mg-5ml. Oral suspension                   | 11 (3)   |
| Cotipred 20mg. Effervescent tablet                    | 11 (3)   |
| Sintrom 4mg. Tablet                                   | 10 (2)   |
| Josacine 125mg-5ml. Granules for oral suspension      | 9 (2)    |
| Doliprane 300mg. Powder for oral solution             | 9 (2)    |
| Crocin ds 240mg. Syrup                                | 9 (2)    |
| Other (<2%)                                           | 241 (57) |

| <b>5<sup>th</sup> level (chemical substance) of the Anatomical Therapeutic Chemical (ATC) classification system</b> |          |
|---------------------------------------------------------------------------------------------------------------------|----------|
| Paracetamol                                                                                                         | 63 (15)  |
| Prednisolone                                                                                                        | 35 (8)   |
| Valproic acid                                                                                                       | 26 (6)   |
| Cefaclor                                                                                                            | 21 (5)   |
| Co-amoxiclav                                                                                                        | 19 (5)   |
| Cefixime                                                                                                            | 17 (4)   |
| Desloratadine                                                                                                       | 15 (4)   |
| Josamycin                                                                                                           | 13 (3)   |
| Fusidic acid                                                                                                        | 13 (3)   |
| Betamethasone                                                                                                       | 13 (3)   |
| Acenocoumarol                                                                                                       | 10 (2)   |
| Amoxicillin                                                                                                         | 10 (2)   |
| Phenobarbital                                                                                                       | 9 (2)    |
| Other (<2%)                                                                                                         | 158 (38) |
| missing data                                                                                                        | 2        |
| <b>2<sup>nd</sup> level (therapeutic subgroup) of the ATC classification system</b>                                 |          |
| Antibacterials                                                                                                      | 122 (29) |
| Analgesics                                                                                                          | 65 (15)  |
| Antiepileptics                                                                                                      | 55 (13)  |
| Corticosteroids                                                                                                     | 51 (12)  |
| Antihistamines                                                                                                      | 21 (5)   |
| Antivirals                                                                                                          | 12 (3)   |
| Psycholeptics                                                                                                       | 11 (3)   |
| Antithrombotic agents                                                                                               | 11 (3)   |
| Constipation                                                                                                        | 10 (2)   |
| Cough and cold preparations                                                                                         | 8 (2)    |
| Other (<2%)                                                                                                         | 58 (13)  |
| <b>Dosage forms</b>                                                                                                 |          |
| Syrup                                                                                                               | 77 (18)  |
| Oral suspension                                                                                                     | 57 (13)  |
| Powder for oral suspension                                                                                          | 45 (11)  |
| Tablet                                                                                                              | 38 (9)   |
| Oral solution                                                                                                       | 34 (8)   |
| Effervescent tablet                                                                                                 | 28 (7)   |
| Fine granules                                                                                                       | 24 (6)   |
| Powder for oral solution                                                                                            | 23 (5)   |
| Granules for oral suspension                                                                                        | 17 (4)   |
| Drops for oral solution                                                                                             | 17 (4)   |
| Coated tablet                                                                                                       | 16 (4)   |
| Divisible tablet                                                                                                    | 12 (3)   |
| Orally disintegrating tablet                                                                                        | 8 (2)    |
| Other (<2%)                                                                                                         | 28 (6)   |
| <b>Dosage form categories</b>                                                                                       |          |
| Oral liquid preparations                                                                                            | 339 (80) |
| Solid oral dosage form                                                                                              | 74 (17)  |
| Buccal preparations                                                                                                 | 11 (3)   |

Table S2. Recoding based on coding instructions and information in text fields.

| <b>Recoding</b> | <b>Patient (Evaluation Per Day)</b> |
|-----------------|-------------------------------------|
|-----------------|-------------------------------------|

|                                                                                                                                                                                                                                        |                                             |
|----------------------------------------------------------------------------------------------------------------------------------------------------------------------------------------------------------------------------------------|---------------------------------------------|
| As the reported intake was 'fully taken' although the reported administration time was < 60 sec, the result of intake has been re-coded from 'fully taken' to 'partly taken'                                                           | 4 patients<br>(2 at D1, 2 at D2, 4 at D10)  |
| As 'use another route/mode of administration' was not ticked although the reported administration time was < 30 sec and the reported intake was different from 'not taken', 'use another route/mode of administration' has been ticked | 10 patients<br>(6 at D1, 4 at D2, 5 at D10) |
| As 'use another route/mode of administration' was ticked, the result of intake has been re-coded from 'fully taken' to 'partly taken'                                                                                                  | 1 patient<br>(1 at D1, 1 at D2, 1 at D10)   |
| Based on text-field of 'divided dose' (hereafter), 'modification of dosage form' has been ticked                                                                                                                                       |                                             |
| "split in two"                                                                                                                                                                                                                         | 1 patient (1 at D10)                        |
| "in two pieces"                                                                                                                                                                                                                        | 1 patient (1 at D1)                         |
| Based on text-field of 'divided dose' (hereafter), 'divided dose' has been unticked and 'use another route/mode of administration' ticked                                                                                              |                                             |
| "30 seconds, the tablet was under the tongue, then crushed in the mouth and swallowed"                                                                                                                                                 | 1 patient (1 at D1)                         |
| Based on text-field of 'mix food/drink' (hereafter), 'modification of dosage form' has been ticked                                                                                                                                     |                                             |
| "100 ml of hot chocolate"                                                                                                                                                                                                              | 1 patient<br>(1 at D1, 1 at D2, 1 at D10)   |
| Based on text-field of 'mix food/drink' (hereafter), 'use device not provided' has been ticked                                                                                                                                         |                                             |
| "a teaspoon of water"                                                                                                                                                                                                                  | 1 patient<br>(1 at D1, 1 at D2, 1 at D10)   |
| Based on text-field of unspecified method (hereafter), 'take food/drink' has been ticked                                                                                                                                               |                                             |
| "drank water afterwards"                                                                                                                                                                                                               | 1 patient (1 at D1)                         |
| "drank water after dispersion"                                                                                                                                                                                                         | 1 patient (1 at D2, 1 at D10)               |
| "a mouthful of water, 1.5 minutes after intake"                                                                                                                                                                                        | 1 patient (1 at D2)                         |
| "after orodispersion of the tablet, the child wanted to drink water"                                                                                                                                                                   | 1 patient (1 at D1)                         |
| "needed to drink water due to poor taste"                                                                                                                                                                                              | 1 patient (1 at D1)                         |
| "drank water after dispersion and swallowing of tablet"                                                                                                                                                                                | 1 patient (1 at D2)                         |
| "drank water after having swallowed"                                                                                                                                                                                                   | 1 patient (1 at D10)                        |

Table S3. Completed indicator matrix for variables with missing values.

2

| Patient | Day | Result Intake |              |           | Patient Reaction |              |          | Preparation and Administration Time |              |       |
|---------|-----|---------------|--------------|-----------|------------------|--------------|----------|-------------------------------------|--------------|-------|
|         |     | Fully taken   | Partly taken | Not taken | Positive         | Neutral      | Negative | Short                               | Medium       | Long  |
| A       | 2   | 1             | 0            | 0         | 0                | 1            | 0        | -0.087                              | <b>0.654</b> | 0.433 |
| B       | 10  | 1             | 0            | 0         | 0.378            | <b>0.486</b> | 0.135    | 0                                   | 1            | 0     |
| C       | 10  | 0.4           | <b>0.599</b> | 0.001     | 1                | 0            | 0        | 1                                   | 0            | 0     |
| D       | 2   | 1             | 0            | 0         | 0                | 1            | 0        | -0.087                              | <b>0.654</b> | 0.433 |
|         | 10  | 0             | 1            | 0         | 1                | 0            | 0        | 0.268                               | <b>0.468</b> | 0.264 |
| E       | 1   | 0             | 0            | 1         | 0                | 0            | 1        | 0.526                               | <b>0.705</b> | -0.23 |
| F       | 10  | <b>0.844</b>  | 0.111        | 0.045     | 0                | 1            | 0        | 0                                   | 0            | 1     |
| G       | 10  | 0             | 1            | 0         | 0.356            | <b>0.425</b> | 0.219    | <b>0.438</b>                        | 0.229        | 0.333 |
| H       | 2   | 1             | 0            | 0         | 1                | 0            | 0        | 0.044                               | 0.49         | 0.466 |
|         | 10  | 1             | 0            | 0         | <b>0.616</b>     | 0.234        | 0.15     | 0                                   | 0            | 1     |
| I       | 2   | 1             | 0            | 0         | <b>0.432</b>     | 0.352        | 0.216    | 0                                   | 0            | 1     |
| J       | 1   | 0             | 1            | 0         | 0                | 0            | 1        | <b>0.602</b>                        | 0.21         | 0.189 |

bold value: the most plausible category.

3
